# Supplementary material for: CRISPR/Cas9-loaded stealth liposomes effectively cleared established HPV16-driven tumours in syngeneic mice
Source: PubMed Central journal article supplement (PMC7790238; doi:10.1371/journal.pone.0223288), 2021-01-07

Figure 3C HMGB-1

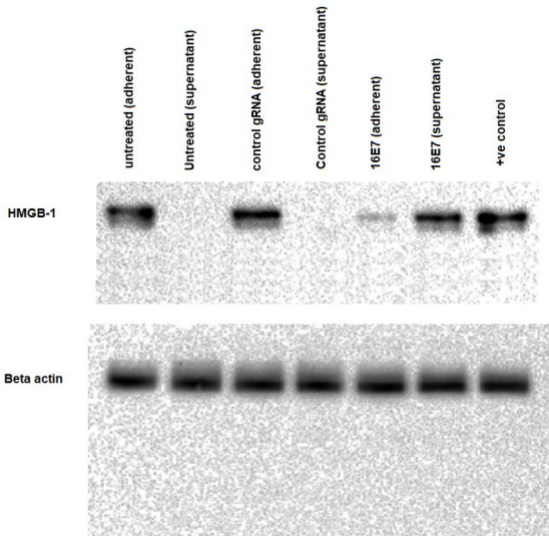

Fig 1C Rb and loading control

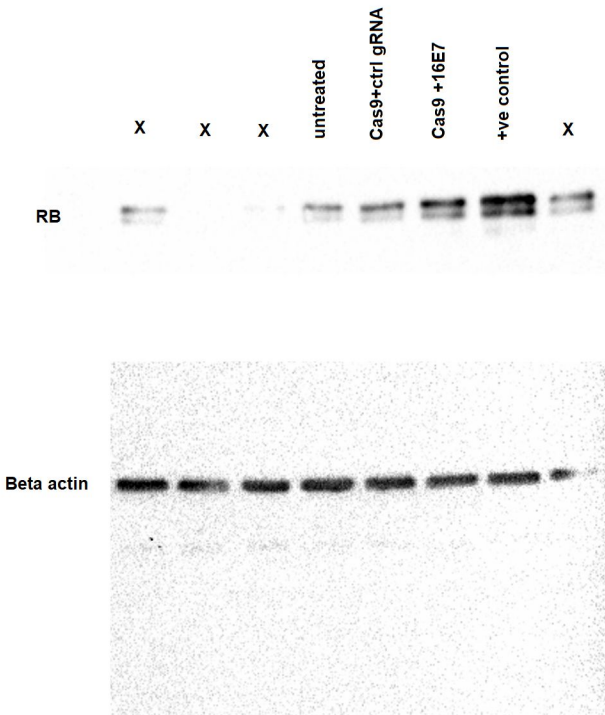

Fig 1D T7E1 assay

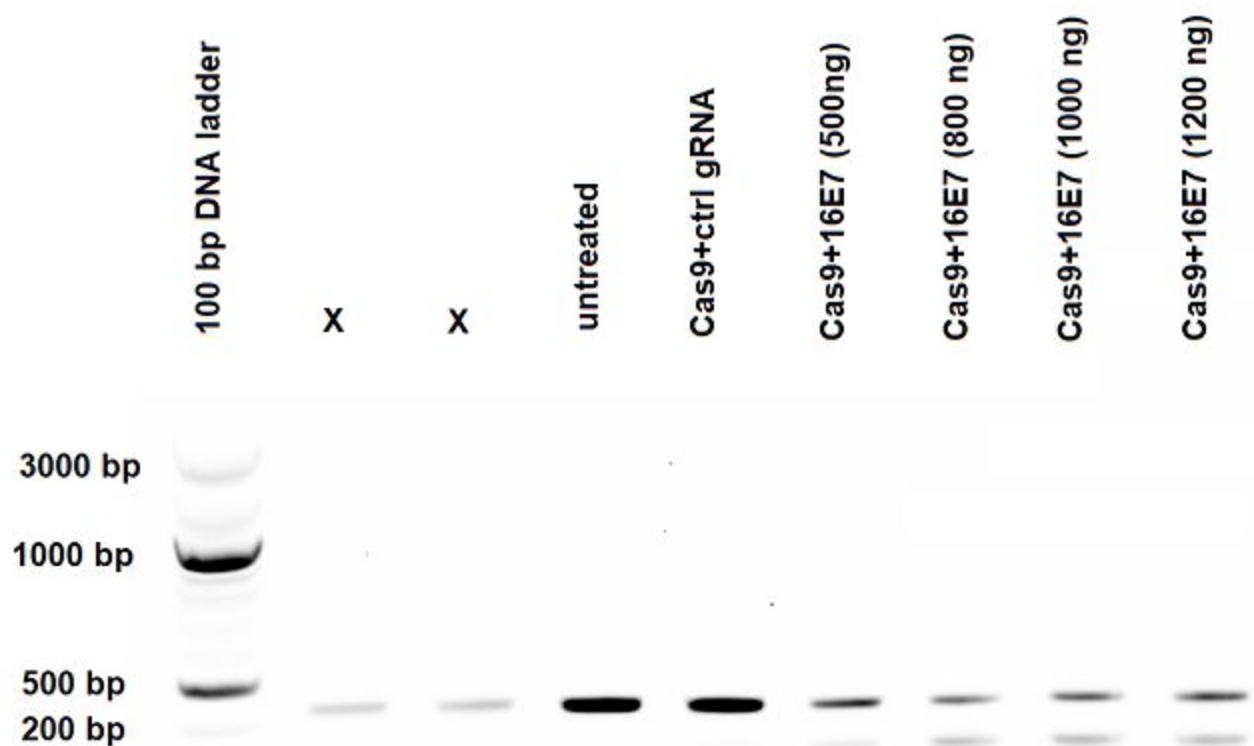

Supplement: pone.0223288.s001.pdf [file pone.0223288.s001.pdf]
